# Supplementary material
Source: Springer Nature journal article supplement (https://www.springermedizin.de/resource/supplementary/12865_2008_239_MOESM2_ESM.pdf/9427574)

GL7<sup>+</sup>B220<sup>+</sup> GC

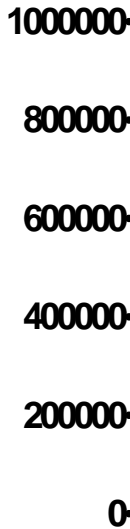

WT

DPP-IV KO

GL7<sup>+</sup>B220<sup>+</sup> GC

PNA<sup>+</sup>GC/10x  
Magnification

PNA<sup>+</sup>GC/10x Magnification

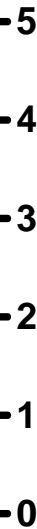

Supplement: MOESM2 [file 9427574]
